# Supplementary material for: Mapping HIV clustering: a strategy for identifying populations at high risk of HIV infection in sub-Saharan Africa
Source: PubMed Central journal article supplement (PMC3669110; doi:10.1186/1476-072x-12-28), 2013-05-22
Supplement: 1476-072X-12-28-S1.pdf [file 1476-072X-12-28-S1.pdf]

## Supplementary Materials

# Mapping HIV clustering: A strategy for identifying populations at high risk of HIV infection in sub-Saharan Africa

Diego F. Cuadros<sup>1, 2\*</sup>, Susanne F. Awad<sup>1</sup> and Laith J. Abu-Raddad<sup>1, 2, 3</sup>

<sup>1</sup>*Infectious Disease Epidemiology Group, Weill Cornell Medical College - Qatar, Cornell University, Qatar Foundation - Education City, Doha, Qatar*

<sup>2</sup>*Department of Public Health, Weill Cornell Medical College, Cornell University, New York 10065-4896, USA*

<sup>3</sup>*Vaccine and Infectious Disease Division, Fred Hutchinson Cancer Research Center, Seattle, Washington 98109, USA*

\*To whom correspondence should be addressed. E-mail: [dfc2002@qatar-med.cornell.edu](mailto:dfc2002@qatar-med.cornell.edu)

## Supplementary methods

### Mathematical model structure

We used a deterministic compartmental mathematical model of the heterosexual transmission of HIV in a population to illustrate the influence of the level of sexual risk behavior on the dynamics of HIV prevalence near the epidemic threshold. The model was developed to study HIV epidemiology and sexual risk behavior in sub-Saharan Africa [1], and was constructed based on extension of earlier models [2, 3]. The model stratifies the sexually active population into compartments according to HIV status, stage of infection, and sexual risk behavior.

The model was expressed in terms of a system of coupled nonlinear differential equations for each risk group as following:

$$\frac{dS_i}{dt} = \mu N_{0,i} - \mu S_i - \Lambda_i S_i \quad (\text{S1})$$

$$\frac{dI_{i,1}}{dt} = \Lambda_i S_i - \mu I_{i,1} - \omega_1 I_{i,1} \quad (\text{S2})$$

$$\frac{dI_{i,2}}{dt} = \omega_1 I_{i,1} - \mu I_{i,3} - \omega_2 I_{i,2} \quad (\text{S3})$$

$$\frac{dI_{i,3}}{dt} = \omega_2 I_{i,2} - \mu I_{i,3} - \omega_3 I_{i,3}. \quad (\text{S4})$$

To introduce heterogeneity in sexual risk behavior, we stratified the population into 10 sexual risk groups, defined with the index  $i$  ( $i = 1, 2, \dots, 10$  representing low to high risk groups).  $S_i$  is the HIV susceptible population in the  $i$ -risk group, and  $I_{i,\beta}$  is the HIV infected population in the  $i$ -risk group. The index  $\beta = 1, 2, 3$  represents the acute, latent, and advanced stages of the infection, respectively.  $N_{0,i}$  is the initial population size of each  $i$ -risk group.  $\mu$  stands for the natural mortality/leaving the sexually active population rate. The rate of progression from one HIV stage to the next is described by

$\omega_1$  and  $\omega_2$ , while  $\omega_3$  is the rate of HIV/AIDS disease mortality.  $\Lambda_i$  calculates the HIV force of infection experienced by the  $S_i$  susceptible population.  $\Lambda_i$  is given by:

$$\Lambda_i = \rho_{S_i} \sum_{j=1}^{10} \sum_{\beta=1}^3 t_{I_{j,\beta} \rightarrow S_i} \mathcal{G}_{i,j} \frac{\rho_{I_{j,\beta}} I_{j,\beta}}{\rho_{S_j} S_j + \sum_{\beta=1,2,3} \rho_{I_{j,\beta}} I_{j,\beta}}, \quad (\text{S5})$$

where  $\rho_{X_i}$  describes the level of sexual risk behavior for each population variable  $X_i$ .  $\rho_{X_i}$  summarizes behavioral characteristics such as the rate of new sexual partners an individual in a specified risk group acquires. But it also characterizes effectively other factors that enhance the risk of exposure to the infection such as concurrency and clustering within sexual networks [2, 4-8], and variability in sexual risk behavior in the population [9]. Since the precise nature of sexual behavior and sexual networks in sub-Saharan Africa is not sufficiently understood, and varies within and across communities [10, 11],  $\rho_{X_i}$  is a summary measure of the population-specific level of sexual risk behavior, and captures the distribution and strength of the risk of exposure to HIV infection.

The form of  $\rho_{X_i}$  distribution across different risk groups was defined through a power law function as

$$\rho_{X_i} = C i^\alpha. \quad (\text{S9})$$

This form is motivated by simulations using an individual-based network model developed to explore the diversity in the level of sexual risk behavior [12], by analyses of the architecture of complex weighted networks [13, 14], and by an analysis of the average separation between individuals in a network or a sub-network [15, 16]. Here  $C$  is a constant determined by the average risk behavior and  $\alpha$  is the exponent parameter that determines the level of variability in the effective sexual partner acquisition rate [12].

The parameter  $t_{I_{j,\beta} \rightarrow S_i}$  in equation S5 defines HIV transmission probability per partnership between an individual of the susceptible population,  $S_i$ , and an individual of the HIV infected population  $I_{j,\beta}$ . It is expressed in terms of HIV transmission probability per coital act per HIV stage in this partnership ( $P_{I_{j,\beta} \rightarrow S_i}^{HIV}$ ), the frequency of coital acts per unit time in this partnership ( $n_{I_{j,\beta} \leftrightarrow S_i}$ ), and the duration ( $\tau_{I_{j,\beta} \leftrightarrow S_i}$ ) of this partnership:

$$t_{I_{j,\beta} \rightarrow S_i} = 1 - \left(1 - P_{I_{j,\beta} \rightarrow S_i}^{HIV}\right)^{n_{I_{j,\beta} \leftrightarrow S_i} \tau_{I_{j,\beta} \leftrightarrow S_i}}. \quad (S6)$$

The mixing among the different risk groups is dictated by the sexual-mixing matrix  $\mathcal{G}_{i,j}$ . This matrix provides the probability that an individual in risk group  $i$  would choose a partner in risk group  $j$ . It is given by

$$\mathcal{G}_{i,j} = e\delta_{i,j} + (1-e) \frac{\rho_{S_j} S_j + \sum_{\beta=1,2,3} \rho_{Y_{\alpha,j}} I_{\beta,j}}{\sum_{k=1,2,3,4} \left( \rho_{S_k} S_k + \sum_{\beta=1,2,3} \rho_{I_{\beta,k}} I_{\beta,k} \right)}. \quad (S7)$$

Here,  $\delta_{i,j}$  is the identity matrix and the parameter  $e \in [0,1]$  measures the degree of assortativeness in the mixing. At the extreme  $e = 0$ , the mixing is proportionate (choosing partners with no preferential bias based on the kind of risk group) while at the other extreme  $e = 1$ , the mixing is fully assortative as individuals choose partners only from within their own risk group [17].

### Sexual risk behavior

The sexually active population was stratified into a number of risk groups where the proportion of the population initially in each risk group  $i$  was determined using a gamma distribution

$$p(i) = \frac{1}{b^a \Gamma(a)} i^{a-1} e^{-\frac{i}{b}} \quad (S8)$$

The gamma distribution is motivated by the degree distribution of the number of sexual partners as identified empirically in studies in sub-Saharan Africa [18-21]. Here  $a$  is the shape parameter determined through normalization of the distribution, and  $b$  is the scale parameter in the gamma distribution of the population size across the risk groups [18].

### **Parameter values**

The parameters of the model were derived using the best available empirical data on HIV epidemiology and natural history, and are listed in Table S2 along with their references. We based HIV transmission probability per coital per each of HIV stages on recent re-analyses of the Rakai Study data [2, 22-24]. The frequency of coital acts per each stage of infection was based on the measurements of Wawer *et al* [24].

The durations of the acute, latent, and advanced stages were assumed to be 49 days (acute), 9 years (latent), and 2 years (advanced). These choices were based on recent compilation of data by UNAIDS indicating that the average duration from HIV acquisition to death, in absence of antiretroviral therapy, is about 11 years [25, 26], and based on the classification in Wawer *et al* [24], re-analysis of the Rakai data for acute infection [22], and measured time from seroconversion to death in several cohort studies [27, 28]. The duration of the sexual activity lifespan is 35 years per definition of the sexually active population in the literature, and conventional guidelines (15-49 years age group) [2, 29, 30].

As for the parameters of sexual risk behavior, the degree of assortativeness ( $e$ ) was fixed at 0.3; a representative value based on model calibration of the HIV epidemic in Kisumu, Kenya [2]. Meanwhile, the scale parameter in the gamma distribution of the population across the different risk groups ( $b$ ) was fixed at 2, based on fitting empirical data of the degree distribution (number of sexual partners per year) [18]. The exponent parameter in the power law function of the distribution of sexual risk behavior ( $\alpha$ ) was fixed at 1.7 for

all countries, based on fitting the distribution of the clustering coefficient of all possible configurations in a sexual network [12].

## Supplementary tables

**Supplementary Table 1 - Characterization of the clusters with high and low HIV prevalence identified in the 20 countries included in the study**

| <b>Country</b>      | <b>Cluster</b> | <b>Sample size</b> | <b>Number of HIV infections</b> | <b>Relative risk (RR)</b> | <b>Radius of cluster (Km)</b> | <b>P value</b> |
|---------------------|----------------|--------------------|---------------------------------|---------------------------|-------------------------------|----------------|
| <b>Senegal</b>      | High 1         | 276                | 12                              | 6.69                      | 95.39                         | 0.001          |
|                     | High 2         | 1232               | 24                              | 3.33                      | 94.84                         | 0.007          |
|                     | Low 1          | 3330               | 8                               | 0.24                      | 92.33                         | 0.002          |
| <b>Mali</b>         | High 1         | 1060               | 27                              | 2.77                      | 11.09                         | 0.026          |
| <b>Congo R. D.</b>  | High 1         | 220                | 11                              | 3.86                      | 32.85                         | 0.047          |
| <b>Sierra Leone</b> | High 1         | 557                | 28                              | 4.31                      | 19.52                         | <0.001         |
|                     | Low 1          | 2727               | 19                              | 0.34                      | 96.66                         | 0.004          |
| <b>Liberia</b>      | High 1         | 2112               | 70                              | 2.74                      | 11.34                         | <0.001         |
|                     | Low 1          | 1274               | 1                               | 0.004                     | 99.37                         | <0.001         |
|                     | Low 2          | 729                | 0                               | 0                         | 81.51                         | 0.001          |
| <b>Burkina Faso</b> | High 1         | 168                | 12                              | 4.99                      | 12.89                         | 0.006          |
|                     | High 2         | 997                | 36                              | 2.59                      | 98.28                         | 0.008          |
| <b>Ethiopia</b>     | High 1         | 425                | 35                              | 4.85                      | 1.98                          | <0.001         |
|                     | High 2         | 618                | 46                              | 4.45                      | 4.44                          | <0.001         |
|                     | High 3         | 304                | 20                              | 3.77                      | 18.96                         | 0.002          |
|                     | High 4         | 2862               | 139                             | 3.34                      | 46.22                         | <0.001         |
|                     | High 5         | 395                | 22                              | 3.19                      | 43.17                         | 0.011          |
|                     | Low 1          | 483                | 0                               | 0                         | 88.76                         | 0.044          |
|                     | Low 2          | 940                | 2                               | 0.11                      | 48.74                         | 0.007          |
|                     | Low 3          | 1386               | 3                               | 0.12                      | 99.09                         | <0.001         |
|                     | Low 4          | 1688               | 5                               | 0.16                      | 97.50                         | <0.001         |
| Low 5               | 1799           | 9                  | 0.27                            | 88.15                     | 0.002                         |                |
| <b>Ghana</b>        | High 1         | 377                | 21                              | 3.25                      | 42.13                         | 0.009          |
|                     | Low 1          | 594                | 0                               | 0                         | 83.53                         | 0.002          |
|                     | Low 2          | 397                | 0                               | 0                         | 84.98                         | 0.045          |
| <b>Burundi</b>      | High 1         | 1131               | 47                              | 2.65                      | 13.22                         | <0.001         |
| <b>Rwanda</b>       | High 1         | 1626               | 134                             | 3.32                      | 10.51                         | <0.001         |
|                     | Low 1          | 1155               | 12                              | 0.31                      | 29.89                         | 0.003          |
|                     | Low 2          | 3437               | 66                              | 0.53                      | 74.32                         | 0.002          |
| <b>Tanzania</b>     | High 1         | 305                | 54                              | 4.41                      | 98.80                         | <0.001         |
|                     | High 2         | 396                | 52                              | 3.48                      | 20.39                         | <0.001         |
|                     | High 3         | 530                | 58                              | 2.91                      | 94.40                         | <0.001         |
|                     | High 4         | 660                | 55                              | 2.19                      | 99.86                         | <0.001         |

|                   |        |      |     |       |       |        |
|-------------------|--------|------|-----|-------|-------|--------|
|                   | High 5 | 201  | 22  | 2.18  | 41.00 | 0.018  |
|                   | Low 1  | 4387 | 34  | 0.14  | 99.6  | <0.001 |
|                   | Low 2  | 281  | 0   | 0     | 72.34 | 0.002  |
|                   | Low 3  | 368  | 2   | 0.13  | 82.96 | 0.016  |
| <b>Cameroon</b>   | High 1 | 121  | 22  | 3.44  | 2.50  | 0.001  |
|                   | High 2 | 239  | 29  | 2.3   | 40.84 | 0.045  |
|                   | Low 1  | 883  | 13  | 0.25  | 99.93 | <0.001 |
| <b>Kenya</b>      | High 1 | 694  | 150 | 4.28  | 67.85 | <0.001 |
|                   | High 2 | 37   | 11  | 4.26  | 5.52  | 0.014  |
|                   | Low 1  | 174  | 0   | 0     | 93.75 | 0.002  |
|                   | Low 2  | 500  | 13  | 0.36  | 85.99 | 0.028  |
|                   | Low 3  | 1061 | 41  | 0.52  | 99.24 | 0.021  |
| <b>Mozambique</b> | High 1 | 218  | 48  | 2.60  | 3.94  | <0.001 |
|                   | High 2 | 315  | 59  | 2.21  | 70.84 | <0.001 |
|                   | High 3 | 3235 | 487 | 2.11  | 97.07 | <0.001 |
|                   | High 4 | 221  | 39  | 2.07  | 72.64 | 0.014  |
|                   | Low 1  | 101  | 0   | 0     | 60.08 | 0.017  |
|                   | Low 2  | 286  | 3   | 0.12  | 75.43 | <0.001 |
|                   | Low 3  | 566  | 7   | 0.14  | 96.10 | <0.001 |
|                   | Low 4  | 473  | 8   | 0.19  | 95.12 | <0.001 |
|                   | Low 5  | 311  | 6   | 0.22  | 57.25 | <0.001 |
|                   | Low 6  | 732  | 17  | 0.26  | 99.80 | <0.001 |
|                   | Low 7  | 309  | 8   | 0.30  | 52.73 | 0.013  |
|                   | Low 8  | 297  | 8   | 0.31  | 65.00 | 0.017  |
| <b>Malawi</b>     | High 1 | 4629 | 712 | 2.11  | 94.49 | <0.001 |
|                   | Low 1  | 156  | 0   | 0     | 32.57 | <0.001 |
|                   | Low 2  | 2524 | 107 | 0.37  | 87.93 | <0.001 |
|                   | Low 3  | 1131 | 56  | 0.47  | 93.41 | <0.001 |
| <b>Zambia</b>     | High 1 | 599  | 133 | 1.74  | 40.88 | <0.001 |
|                   | High 2 | 1246 | 290 | 1.72  | 66.62 | <0.001 |
|                   | High 3 | 363  | 89  | 1.72  | 54.26 | <0.001 |
|                   | High 4 | 234  | 59  | 1.70  | 5.74  | 0.010  |
|                   | Low 1  | 101  | 1   | 0.067 | 84.82 | <0.001 |
|                   | Low 2  | 113  | 2   | 0.12  | 84.52 | 0.002  |
|                   | Low 3  | 152  | 4   | 0.18  | 91.30 | <0.001 |
|                   | Low 4  | 191  | 7   | 0.25  | 81.40 | <0.001 |
|                   | Low 5  | 179  | 7   | 0.26  | 33.32 | 0.002  |
|                   | Low 6  | 360  | 19  | 0.35  | 88.06 | <0.001 |
|                   | Low 7  | 404  | 33  | 0.55  | 99.95 | 0.047  |
| <b>Zimbabwe</b>   | High 1 | 374  | 115 | 1.91  | 77.13 | <0.001 |
|                   | High 2 | 334  | 91  | 1.68  | 47.90 | 0.001  |
|                   | High 3 | 1281 | 266 | 1.29  | 94.30 | 0.029  |
|                   | Low 1  | 527  | 38  | 0.43  | 87.80 | <0.001 |



|                  |             |      |     |      |       |        |
|------------------|-------------|------|-----|------|-------|--------|
|                  | Low 2       | 105  | 2   | 0.11 | 28.24 | 0.002  |
|                  | Low 3       | 139  | 5   | 0.22 | 34.50 | 0.004  |
|                  | Low 4       | 513  | 51  | 0.59 | 45.35 | 0.029  |
|                  | Low 5       | 198  | 13  | 0.39 | 23.23 | 0.045  |
| <b>Lesotho</b>   | High 1      | 2880 | 734 | 1.28 | 72.21 | <0.001 |
|                  | Low 1       | 712  | 101 | 0.61 | 37.84 | <0.001 |
|                  | Low 2       | 788  | 129 | 0.71 | 38.24 | 0.034  |
| <b>Guinea</b>    | No clusters | –    | –   | –    | –     | –      |
| <b>Swaziland</b> | No clusters | –    | –   | –    | –     | –      |

**Supplementary Table 2 - Model assumptions in terms of parameter values**

| Assumption                                                                                                      | Parameter value | Sources                  |
|-----------------------------------------------------------------------------------------------------------------|-----------------|--------------------------|
| HIV transmission probability per coital act per stage of infection ( $p_{I_{\beta,i} \rightarrow S_j}^{HIV}$ ): |                 |                          |
| Acute stage                                                                                                     | 0.0107          | [22-24, 31]              |
| Latent stage                                                                                                    | 0.0008          | [2, 24]                  |
| Late stage                                                                                                      | 0.0042          | [22-24]                  |
| Duration of each of HIV stages ( $1/\omega_{I_{\beta}}$ ):                                                      |                 |                          |
| Acute stage                                                                                                     | 49 days         | [22, 24, 25, 27, 28, 32] |
| Latent stage                                                                                                    | 9.0 years       | [22, 24, 25, 27, 28, 32] |
| Late stage                                                                                                      | 2.0 years       | [22, 24, 25, 27, 28, 32] |
| Frequency of coital acts per HIV stage ( $n_{I_{\beta,i} \leftrightarrow S_j}$ ):                               |                 |                          |
| Acute stage                                                                                                     | 10.6 per month  | [24]                     |
| Latent stage                                                                                                    | 11.0 per month  | [24]                     |
| Late stage                                                                                                      | 7.1 per month   | [24]                     |
| Duration of sexual partnerships ( $\tau_{I_{\beta,i} \leftrightarrow S_j}$ ):                                   | 6 months        | Representative value     |
| Duration of the sexual lifespan ( $1/\mu$ )                                                                     | 35 years        | [2, 29, 30]              |
| Degree of assortativeness ( $e$ )                                                                               | 0.3             | [2]                      |
| The scale parameter in the gamma distribution of the population across the risk groups ( $b$ )                  | 2               | [18]                     |
| The exponent parameter in the power law function of the distribution of sexual risk behavior ( $\alpha$ )       | 1.7             | [12]                     |

## References

1. Awad SF, Abu-Raddad LJ: **A signature of dramatic declines in sexual risk behavior in sub-Saharan Africa in the mid-1990s** *Under preparation* 2013.
2. Abu-Raddad LJ, Longini IM, Jr.: **No HIV stage is dominant in driving the HIV epidemic in sub-Saharan Africa.** *Aids* 2008, **22**:1055-1061.
3. Abu-Raddad LJ, Patnaik P, Kublin JG: **Dual infection with HIV and malaria fuels the spread of both diseases in sub-Saharan Africa.** *Science* 2006, **314**:1603-1606.
4. Kretzschmar M, Morris M: **Measures of concurrency in networks and the spread of infectious disease.** *Math Biosci* 1996, **133**:165-195.
5. Morris M: **Sexual networks and HIV.** *AIDS* 1997, **11**:S209-S216.
6. Watts CH, May RM: **The influence of concurrent partnerships on the dynamics of HIV/AIDS.** *Math Biosci* 1992, **108**:89-104.
7. Kretzschmar M, Morris M: **Measures of concurrency in networks and the spread of infectious disease.** *Math Biosci* 1996, **133**:165-195.
8. Morris M: **Sexual networks and HIV.** *AIDS* 1997, **11 Suppl A**:S209-216.
9. May RM, Anderson RM: **The Transmission Dynamics of Human Immunodeficiency Virus (Hiv).** *Philosophical Transactions of the Royal Society of London Series B-Biological Sciences* 1988, **321**:565-607.
10. Ferry B, Carael M, Buve A, Auvert B, Laourou M, Kanhonou L, de Loenzien M, Akam E, Chege J, Kaona F: **Comparison of key parameters of sexual behaviour in four African urban populations with different levels of HIV infection.** *Aids* 2001, **15 Suppl 4**:S41-50.
11. Lagarde E, Auvert B, Carael M, Laourou M, Ferry B, Akam E, Sukwa T, Morison L, Maury B, Chege J, et al: **Concurrent sexual partnerships and HIV prevalence in five urban communities of sub-Saharan Africa.** *Aids* 2001, **15**:877-884.

12. Awad SF, Cuadros DF, Abu-Raddad LJ: **Generic patterns of HIV infection distribution in human populations.** *Under preparation* 2013.
13. Barrat A, Barthelemy M, Pastor-Satorras R, Vespignani A: **The architecture of complex weighted networks.** *Proceedings of the National Academy of Sciences of the United States of America* 2004, **101**:3747-3752.
14. Boccaletti S, Latora V, Moreno Y, Chavez M, Hwang DU: **Complex networks: Structure and dynamics.** *Physics Reports* 2006, **424**:175-308.
15. Watts DJ, Strogatz SH: **Collective dynamics of 'small-world' networks.** *Nature* 1998, **393**:440-442.
16. Barabási AL: *Linked: how everything is connected to everything else and what it means for business, science and everyday life.* London: First Plume Printing; 2003.
17. Garnett GP, Anderson RM: **Factors controlling the spread of HIV in heterosexual communities in developing countries: patterns of mixing between different age and sexual activity classes.** *Philosophical transactions of the Royal Society of London Series B, Biological sciences* 1993, **342**:137-159.
18. Cuadros DF, Crowley PH, Augustine B, Stewart SL, Garcia-Ramos G: **Effect of variable transmission rate on the dynamics of HIV in sub-Saharan Africa.** *BMC infectious diseases* 2011, **11**:216.
19. Handcock MS, Jones JH: **Likelihood-based inference for stochastic models of sexual network formation.** *Theoretical population biology* 2004, **65**:413-422.
20. Hamilton DT, Handcock MS, Morris M: **Degree distributions in sexual networks: a framework for evaluating evidence.** *Sex Transm Dis* 2008, **35**:30-40.
21. Bansal S, Grenfell BT, Meyers LA: **When individual behaviour matters: homogeneous and network models in epidemiology.** *Journal of the Royal Society, Interface / the Royal Society* 2007, **4**:879-891.

22. Pinkerton SD: **Probability of HIV transmission during acute infection in Rakai, Uganda.** *AIDS Behav* 2008, **12**:677-684.
23. Hollingsworth TD, Anderson RM, Fraser C: **HIV-1 transmission, by stage of infection.** *The Journal of infectious diseases* 2008, **198**:687-693.
24. Wawer MJ, Gray RH, Sewankambo NK, Serwadda D, Li X, Laeyendecker O, Kiwanuka N, Kigozi G, Kiddugavu M, Lutalo T, et al: **Rates of HIV-1 transmission per coital act, by stage of HIV-1 infection, in Rakai, Uganda.** *The Journal of infectious diseases* 2005, **191**:1403-1409.
25. UNAIDS: **UNAIDS Reference Group on Estimates, Modelling and Projections.** 2007.
26. UNAIDS/WHO: *AIDS epidemic update 2007.* In *Book AIDS epidemic update 2007.* City.
27. UNAIDS/WHO: *AIDS epidemic update 2010: UNAIDS fact sheet (available at [http://www.unaids.org/documents/20101123\\_FS\\_SSA\\_em\\_en.pdf](http://www.unaids.org/documents/20101123_FS_SSA_em_en.pdf), accessed 23 July 2012).* In *Book AIDS epidemic update 2010: UNAIDS fact sheet (available at [http://www.unaids.org/documents/20101123\\_FS\\_SSA\\_em\\_en.pdf](http://www.unaids.org/documents/20101123_FS_SSA_em_en.pdf), accessed 23 July 2012).* City; 2010.
28. UNAIDS/WHO: **Epidemiological data, HIV estimates 1990-2009 (available at <http://www.unaids.org/en/dataanalysis/epidemiology/>).** In *Book Epidemiological data, HIV estimates 1990-2009 (available at <http://www.unaids.org/en/dataanalysis/epidemiology/>).* City; 2010.
29. Buve A, Carael M, Hayes RJ, Auvert B, Ferry B, Robinson NJ, Anagonou S, Kanhonou L, Laourou M, Abega S, et al: **Multicentre study on factors determining differences in rate of spread of HIV in sub-Saharan Africa: methods and prevalence of HIV infection.** *Aids* 2001, **15 Suppl 4**:S5-14.
30. UNAIDS: **UNAIDS Report on the Global AIDS Epidemic 2010.** In *Book UNAIDS Report on the Global AIDS Epidemic 2010.* City; 2010.

31. Wawer MJ, Reynolds SJ, Serwadda D, Kigozi G, Kiwanuka N, Gray RH: **Might male circumcision be more protective against HIV in the highly exposed? An immunological hypothesis.** *Aids* 2005, **19**:2181-2182.
32. UNAIDS/WHO: **AIDS epidemic update 2007.** 2007.
